# Supplementary material for: Preparation of “pomegranate”-like QD/SiO2/poly(St-co-MAA) fluorescent nanobeads in two steps to improve stability and biocompatibility
Source: Royal Society of Chemistry journal article supplement (doi:10.1039/d1nj00526j), 2021-01-01
Supplement: d1nj00526j1.pdf [file d1nj00526j1.pdf]

## Supplementary information

Preparation of “pomegranate”-like QDs/SiO<sub>2</sub>/Poly(St-co-MAA)  
fluorescent nanobeads with two steps to improve stability and  
biocompatibility

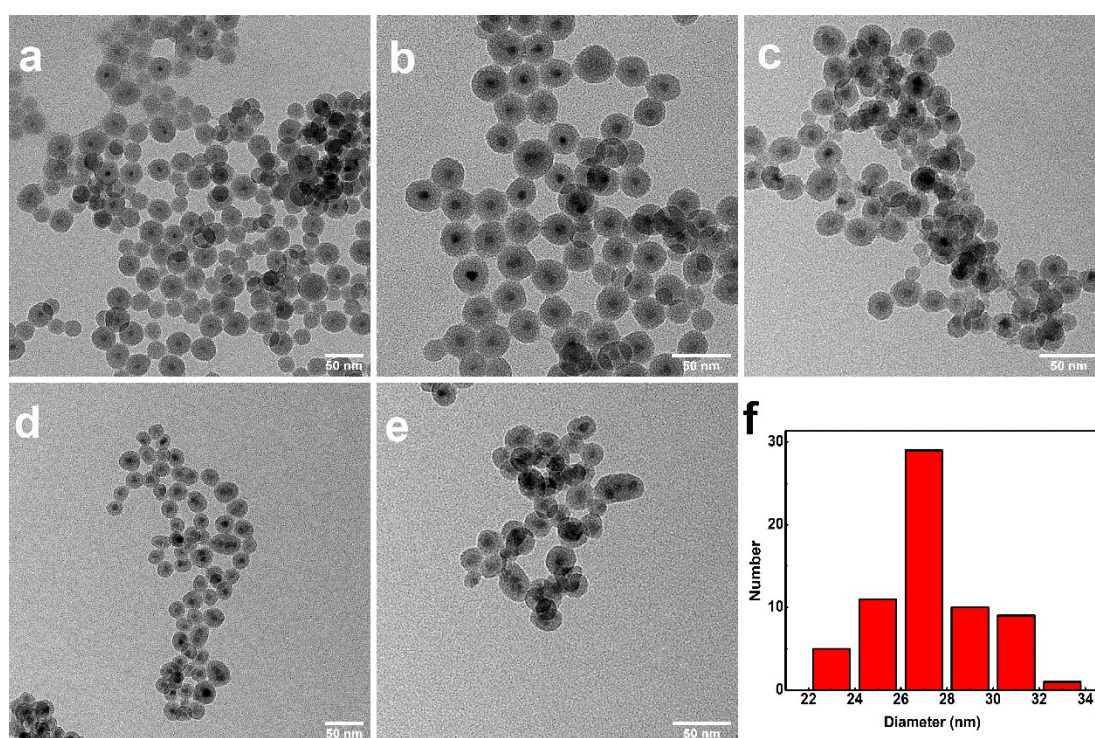

**Figure S1** TEM images of QSI-C=C nanobeads with different volume in reverse microemulsion method **(a)** 200 $\mu$ L; **(b)** 400 $\mu$ L; **(c)** 600 $\mu$ L; **(d)** 800 $\mu$ L; **(e)** 1000 $\mu$ L; **(f)** Size distribution of **(b)** 400 $\mu$ L.

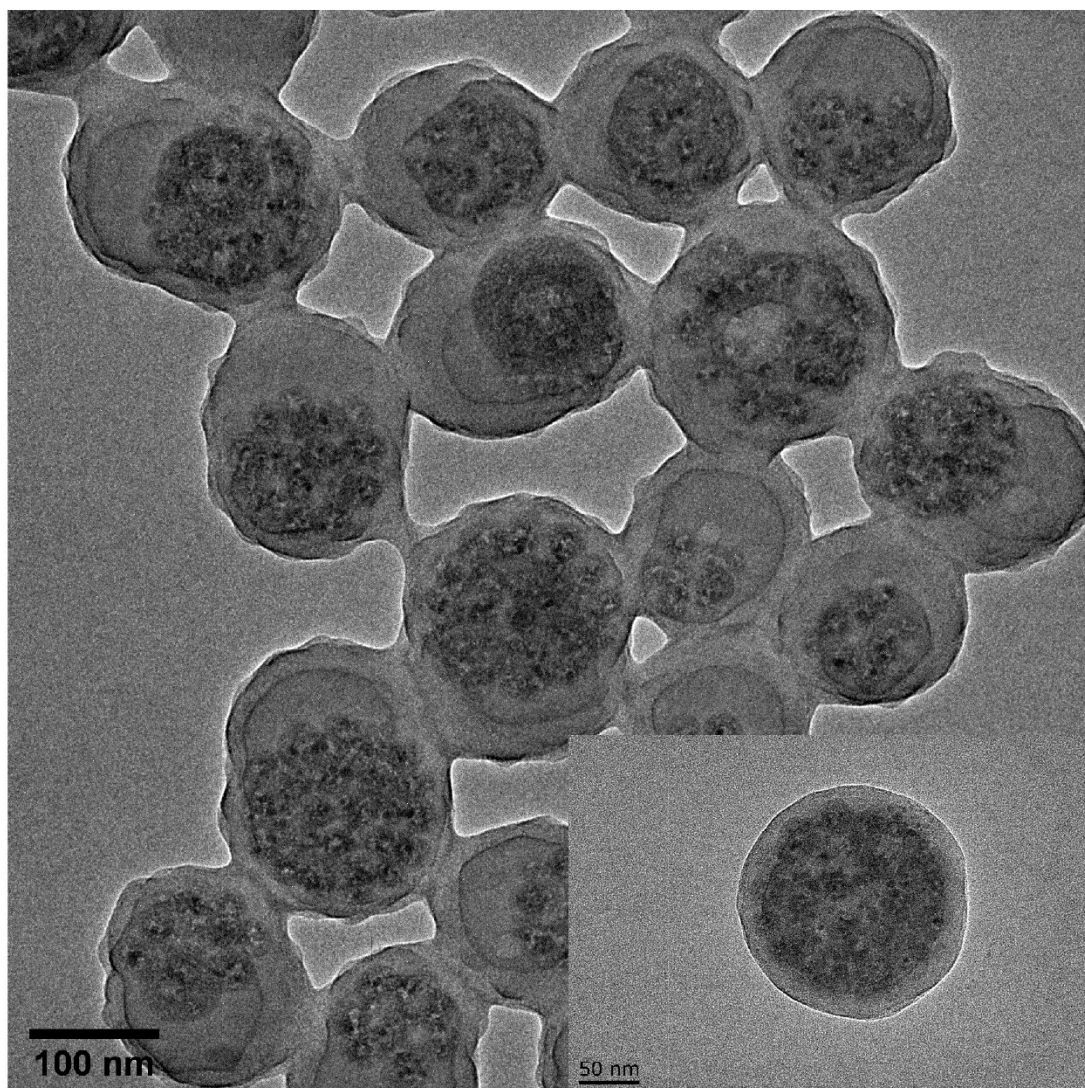

**Figure S2** TEM images of QSIP-COOH nanobeads.

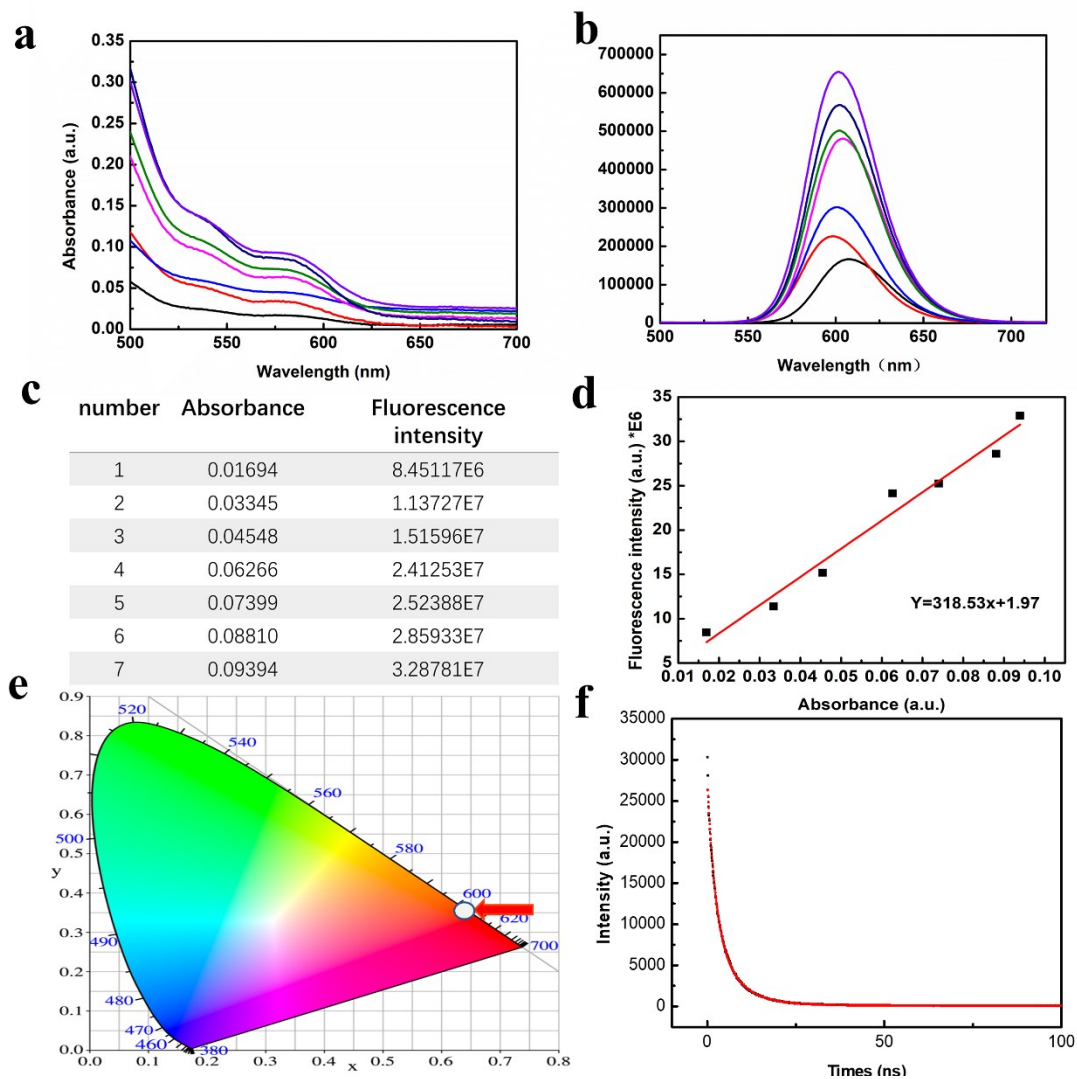

**Figure S3 (a) Absorbance and (b) Fluorescence intensity of QDs; (c) Data and (d) Analysis of a and b; (e) The chromaticity diagram of QDs; (f) The fluorescence lifetime of QDs.**

**Table S1** Test results of different levels of the inter-assay coefficient of variation and intra-assay coefficient of variation of the ICTS based on QSIP-COOH nanobeads.

| the concentration of HCG antigen (ng/mL) | the inter-assay coefficient of variation (inter-CV%, n=3) | intra-assay coefficient of variation (intra-CV%, n=3) |
|------------------------------------------|-----------------------------------------------------------|-------------------------------------------------------|
| 1000                                     | 7.80                                                      | 7.45                                                  |
|                                          | 8.13                                                      |                                                       |
|                                          | 6.41                                                      |                                                       |
| 500                                      | 8.47                                                      | 10.16                                                 |
|                                          | 11.35                                                     |                                                       |
|                                          | 10.68                                                     |                                                       |
|                                          | 10.84                                                     |                                                       |
| 250                                      | 12.57                                                     | 12.24                                                 |
|                                          | 13.33                                                     |                                                       |
|                                          |                                                           |                                                       |
